# Supplementary material
Source: PubMed Central journal article supplement (PMC5786166)
Supplement: NIHMS935546-supplement-2.pdf [file NIHMS935546-supplement-2.pdf]

575 *Supplementary Information*

576 Supplementary Table 1: Studies included in the meta-analysis that met our inclusion criteria. Studies  
 577 must have included manipulations using an immune stimulant that did not include live infections; treated  
 578 animals must have been compared to a control group that was either unmanipulated or procedural (e.g.,  
 579 sham, saline); reported study outcomes that measured a fitness, performance, or other functional response  
 580 (e.g., activity, food intake, growth rate, mass change, egg production, egg size, gonad size, breeding  
 581 effort, individual survival, recruitment rate, dispersal behavior).

| <b>Author</b>                      | <b>Study year</b> | <b>Study species</b>                                               | <b>Species class</b> |
|------------------------------------|-------------------|--------------------------------------------------------------------|----------------------|
| Adelman <i>et al.</i> (48)         | 2010              | <i>Melospiza melodia fallax</i> , <i>Melospiza melodia morphna</i> | Aves                 |
| Ahmed <i>et al.</i> (49)           | 2002              | <i>Anopheles gambiae</i>                                           | Insecta              |
| Armitage <i>et al.</i> (50)        | 2003              | <i>Tenebrio molitor</i>                                            | Insecta              |
| Ashley <i>et al.</i> (51)          | 2009              | <i>Zonotrichia leucophrys gambelii</i>                             | Aves                 |
| Barribeau <i>et al.</i> (52)       | 2010              | <i>Acyrtosiphon pisum</i>                                          | Insecta              |
| Bascunan-Garcia <i>et al.</i> (53) | 2010              | <i>Acheta domesticus</i>                                           | Insecta              |
| Bertrand <i>et al.</i> (54)        | 2006              | <i>Taeniopygia guttata</i>                                         | Aves                 |
| Biard <i>et al.</i> (55)           | 2009              | <i>Turdus merula</i>                                               | Aves                 |
| Bonneaud <i>et al.</i> (19)        | 2004              | <i>Passer domesticus</i>                                           | Aves                 |
| Burness <i>et al.</i> (56)         | 2010              | <i>Taeniopygia guttata</i>                                         | Aves                 |
| Cai <i>et al.</i> (57)             | 2009              | <i>Lasiopodomys brandtii</i>                                       | Mammalia             |
| Costantini & Dell’Omo (58)         | 2006              | <i>Falco tinnunculus</i>                                           | Aves                 |
| Derting & Virk (59)                | 2005              | <i>Peromyscus leucopus</i>                                         | Mammalia             |
| Dreiss <i>et al.</i> (60)          | 2008              | <i>Hirundo rustica</i>                                             | Aves                 |
| Ekblom <i>et al.</i> (61)          | 2005              | <i>Gallinago media</i>                                             | Aves                 |
| Eraud <i>et al.</i> (62)           | 2005              | <i>Streptopelia decaocto</i>                                       | Aves                 |
| Eraud <i>et al.</i> (63)           | 2009              | <i>Streptopelia decaocto</i>                                       | Aves                 |
| Fair & Myers (64)                  | 2002              | <i>Sialia mexicana</i>                                             | Aves                 |
| Février <i>et al.</i> (65)         | 2009              | <i>Cornu aspersum aspersa</i> ; <i>Cornu aspersum maxima</i>       | Gastropoda           |
| Freitak (66)                       | 2003              | <i>Pieris brassicae</i>                                            | Insecta              |
| Gautier <i>et al.</i> (67)         | 2008              | <i>Taeniopygia guttata</i>                                         | Aves                 |
| Grindstaff (68)                    | 2008              | <i>Coturnix japonica</i>                                           | Aves                 |
| Hôrak <i>et al.</i> (69)           | 2006              | <i>Carduelis chloris</i>                                           | Aves                 |
| Jacot <i>et al.</i> (70)           | 2004              | <i>Gryllus campestris</i>                                          | Insecta              |
| Jacot <i>et al.</i> (71)           | 2005              | <i>Gryllus campestris</i>                                          | Insecta              |
| Kati & Hardie (72)                 | 2010              | <i>Aphis fabae</i>                                                 | Insecta              |
| Laugero & Moberg (20)              | 2000              | <i>Mus musculus</i>                                                | Mammalia             |
| Laugero & Moberg (73)              | 2000              | <i>Mus musculus</i>                                                | Mammalia             |
| Li <i>et al.</i> (74)              | 2009              | <i>Crassostrea gigas</i>                                           | Bivalvia             |
| López <i>et al.</i> (75)           | 2009              | <i>Podarcis hispanica</i>                                          | Reptilia             |
| Mallon <i>et al.</i> (76)          | 2003              | <i>Apis mellifera</i>                                              | Insecta              |
| Martin (77)                        | 2005              | <i>Passer domesticus</i>                                           | Aves                 |
| Meylan <i>et al.</i> (78)          | 2010              | <i>Zootoca vivipara</i>                                            | Reptilia             |

|                                |      |                                                                                   |          |
|--------------------------------|------|-----------------------------------------------------------------------------------|----------|
| Moret & Schmid-Hempel (79)     | 2004 | <i>Bombus terrestris</i>                                                          | Insecta  |
| Munoz <i>et al.</i> (80)       | 2010 | <i>Zonotrichia leucophrys oriantha</i>                                            | Aves     |
| Owen-Ashley <i>et al.</i> (81) | 2008 | <i>Zonotrichia leucophrys pugetensis</i> ; <i>Zonotrichia leucophrys gambelii</i> | Aves     |
| Råberg <i>et al.</i> (82)      | 2000 | <i>Parus caeruleus</i>                                                            | Aves     |
| Reaney & Knell (83)            | 2010 | <i>Euoniticellus intermedius</i>                                                  | Insecta  |
| Sijben <i>et al.</i> (84)      | 1998 | <i>Sus scrofa</i>                                                                 | Mammalia |
| Svensson <i>et al.</i> (85)    | 1998 | <i>Parus caeruleus</i>                                                            | Aves     |
| Williams <i>et al.</i> (86)    | 1999 | <i>Sturnus vulgaris</i>                                                           | Aves     |

582

583

584 Supplementary Table 2: Sources of mass and life history information (average life expectancy, average  
 585 time to maturity) if the information was not available in the source paper.

| Species                          | Information source                                                                                                                                                    |
|----------------------------------|-----------------------------------------------------------------------------------------------------------------------------------------------------------------------|
| <i>Acyrtosiphon pisum</i>        | Sakurai, et al. 2005 (87)<br>Eastop 1971 (88)                                                                                                                         |
| <i>Anopheles gambiae</i>         | <a href="http://www.cdc.gov">http://www.cdc.gov</a>                                                                                                                   |
| <i>Aphis fabae</i>               | Banks, et al. 1964 (89)                                                                                                                                               |
| <i>Apis mellifera</i>            | Ellis & Delaplane 2009 (90)<br><a href="http://animaldiversity.org/">http://animaldiversity.org/</a>                                                                  |
| <i>Bombus terrestris</i>         | <a href="http://www.bumblebee.org">http://www.bumblebee.org</a>                                                                                                       |
| <i>Carduelis chloris</i>         | <a href="http://eol.org">http://eol.org</a>                                                                                                                           |
| <i>Coturnix japonica</i>         | <a href="http://animaldiversity.org/">http://animaldiversity.org/</a>                                                                                                 |
| <i>Crassostrea gigas</i>         | <a href="http://www.fao.org">http://www.fao.org</a><br>Pauley, et al. 1988 (91)                                                                                       |
| <i>Falco tinnunculus</i>         | <a href="http://animaldiversity.org/">http://animaldiversity.org/</a>                                                                                                 |
| <i>Gallinago media</i>           | del Hoyo, et al. 1991 (92)                                                                                                                                            |
| <i>Gryllus campestris</i>        | Holzer, et al. 2003 (93)                                                                                                                                              |
| <i>Hirundo rustica</i>           | <a href="http://animaldiversity.org/">http://animaldiversity.org/</a>                                                                                                 |
| <i>Lasiopodomys brandtii</i>     | <a href="http://genomics.senescence.info/species">http://genomics.senescence.info/species</a>                                                                         |
| <i>Melospiza melodia fallax</i>  | <a href="http://animaldiversity.org/">http://animaldiversity.org/</a>                                                                                                 |
| <i>Melospiza melodia morphna</i> | Owen-Ashley 2006 (94)<br><a href="http://animaldiversity.org/">http://animaldiversity.org/</a>                                                                        |
| <i>Parus caeruleus</i>           | Dhondt 1989 (95)<br><a href="http://eol.org">http://eol.org</a>                                                                                                       |
| <i>Passer domesticus</i>         | <a href="http://genomics.senescence.info/species">http://genomics.senescence.info/species</a><br><a href="http://animaldiversity.org/">http://animaldiversity.org</a> |
| <i>Peromyscus leucopus</i>       | <a href="http://animaldiversity.org/">http://animaldiversity.org/</a>                                                                                                 |
| <i>Podarcis hispanica</i>        | Gabirot, et al. 2013 (96)                                                                                                                                             |
| <i>Sialia mexicana</i>           | <a href="http://animaldiversity.org/">http://animaldiversity.org/</a>                                                                                                 |
| <i>Streptopelia decaocto</i>     | <a href="http://eol.org">http://eol.org</a>                                                                                                                           |
| <i>Sturnus vulgaris</i>          | <a href="http://animaldiversity.org/">http://animaldiversity.org/</a><br>Linz, et al. 2007 (97)                                                                       |
| <i>Sus scrofa</i>                | <a href="http://animaldiversity.org/">http://animaldiversity.org/</a>                                                                                                 |
| <i>Taeniopygia guttata</i>       | <a href="http://animaldiversity.org/">http://animaldiversity.org/</a>                                                                                                 |
| <i>Turdus merula</i>             | <a href="http://eol.org">http://eol.org</a>                                                                                                                           |

|                                          |                                                                       |
|------------------------------------------|-----------------------------------------------------------------------|
| <i>Zonotrichia leucophrys gambelii</i>   | Morton & Pereyra 1987 (98)                                            |
| <i>Zonotrichia leucophrys pugetensis</i> | <a href="http://eol.org">http://eol.org</a>                           |
| <i>Zootoca vivipara</i>                  | <a href="http://animaldiversity.org/">http://animaldiversity.org/</a> |

586
